# Supplementary material for: miR-128-3p inhibits intramuscular adipocyte differentiation in chicken by down regulating FDPS
Source: Research Square preprint supplement (doi:10.21203/rs.3.rs-3132361/v1), 2023-07-24
Supplement: Supplementary file 2 [file e9557f02c9a292a5245875d9.xlsx]

## Sheet: S1 q-PCR primer sequences
Table S1 q-PCR primer sequences
Gene	Reverse primer sequence (5'-3')
miR-128-3p	GTCGTATCCAGTGCAGGGTCCGA GGTATTCGCACTGGATACGACGGCCGG
	F: CGCGCGCGCACAGGAA
	R: AGTGCAGGGTCCGAGGTATT
U6	GTCGTATCCAGTGCAGGGTCCGA GGTATTCGCACTGGATACGACCGATACA
	F: GGGCCATGCTAATCTTCTCTGTATCG
	R: GTGCAGGGTCCGAGGT
βactin	F: CAGCCAGCCATGGATGATGA
	R: ACCAACCATCACACCCTGAT
PPARA	F: AATGAAATTCAATGCACTGG
	R: CAGTTTCAGTACATGCACA
CEBPA	F: AAGATGATGCCCGCCGACCAC
	R: CATGGCCTTCACCAGCGAGCTT
FASN	F: GATTGTTTCCCCACTTCGAC
	R: CTGTTGCCAGCATAATGTCC
PPARG	F: ACCTCACGAGGAGTCTTCCA
	R: GCTTCTCCTTCTCCGCTTGT
FABP 4	F: CTGCTACCTGGCCTGACAAA
	R: CAGTGTGCCACTGTCTAGGG
Bcl 2	F: CAACGGAGGATGGGATGCC
	R: CTTATGTCCAAGATAAGCG
P21	F: GAAGAGTTGTCCACGATAAGC
	R: TTCCAGTCCTCCTCAGTCC
PCNA	F: AGCACCAAATCAGGAAAAG
	R: GCACAGGAGATGACAACAG
FDPS	F: CTCATCACAGCTCCCGTCT
	R: CTCGTGTTCTTCCTTACTGTCG
	R: AGGCAATCAAATTTTAACTGGA
CACNB3	F: CGTTAGCACCCATCATCGTCT
	R: GCTGCCATCATCTGCACGTT
CHRDL2	F: CAATCCCCTAACCGTGCCAGA
	R: TCTTGTGAGTGCCTAACACCT
FMO3	F: GATGCGGTTATCTTTGCCACT
	R: ATCCAATGACTGCCATGGTTG
PDGFRA	F: TATCATTTGAAAACACCGGAG
	R: TCTTATATGAAGCAGGTCGAT
STK32C	F: GCACATCATTCACAGAGACGTA
	R: ACCGTCCCTAATTATTGTTGC
Abbreviation:F and R refer to the forward and reverse primers.

## Sheet: S2 Statistics of downstream dat
Table S2 Statistics of downstream data
Sample	Reads No.	Bases (bp)	Q30 (bp)	N (%)	Q20 (%)	Q30 (%)
NC1	42175052	6326257800	6035982039	0.000948	98.21	95.41
NC2	40888790	6133318500	5851610853	0.000933	98.25	95.4
NC3	40928368	6139255200	5861019538	0.000923	98.26	95.46
M1	41813908	6272086200	5980917669	0.000942	98.22	95.35
M2	43316842	6497526300	6206687278	0.000945	98.26	95.52
M3	43573068	6535960200	6219387311	0.000808	98.11	95.15
Si1	42992872	6448930800	6153105967	0.000927	98.26	95.41
Si2	42550522	6382578300	6088789630	0.000941	98.21	95.39
Si3	44916760	6737514300	6439378688	0.000932	98.22	95.57

## Sheet: S3 Data filtering analysis
Table S3 Data filtering analysis
Sample	Clean Reads No.	Clean Data (bp)	Clean Reads %	Clean Data %
NC1	39243708	5886556200	93.04	93.04
NC2	37856760	5678514000	92.58	92.58
NC3	38013846	5702076900	92.87	92.87
M1	38624696	5793704400	92.37	92.37
M2	40181272	6027190800	92.76	92.76
M3	40228998	6034349700	92.32	92.32
Si1	40073414	6011012100	93.2	93.2
Si2	39691466	5953719900	93.28	93.28
Si3	40110268	6016540200	89.29	89.29

## Sheet: S4 Sequencing data positioning
Table S4 Sequencing data positioning
Sample	Map Events	Mapped to Gene	Mapped_to_InterGene	Mapped_to_Exon
NC1	35675399	30721377(86.11%)	4954022 (13.89%)	28182865 (91.74%)
NC2	34347513	29697574(86.46%)	4649939 (13.54%)	27416264 (92.32%)
NC3	34488998	29702030 (86.12%)	4786968 (13.88%)	27557298 (92.78%)
M1	35095405	30290673 (86.31%)	4804732 (13.69%)	27973186 (92.35%)
M2	36336310	31274067 (86.07%)	5062243 (13.93%)	29072793 (92.96%)
M3	36345036	31281273 (86.07%)	5063763 (13.93%)	29191171 (93.32%)
Si1	36274484	31118817(85.79%)	5155667 (14.21%)	28550479 (91.75%)
Si2	35816021	30641338 (85.55%)	5174683 (14.45%)	28271619 (92.27%)
Si3	35933877	30538737 (84.99%)	5395140 (15.01%)	28422789 (93.07%)

## Sheet: S5 RNASeq Map Statistics
Table S5 RNASeq Map Statistics
Sample	Clean_Reads	Total_Mapped	Multiple_Mapped	Uniquely_Mapped
NC1	39243708	36446116 (92.87%)	770717 (2.11%)	35675399 (97.89%)
NC2	37856760	35062972 (92.62%)	715459 (2.04%)	34347513 (97.96%)
NC3	38013846	35199571 (92.60%)	710573 (2.02%)	34488998 (97.98%)
M1	38624696	35813173 (92.72%)	717768 (2.00%)	35095405 (98.00%)
M2	40181272	37116561 (92.37%)	780251 (2.10%)	36336310 (97.90%)
M3	40228998	37121463 (92.28%)	776427 (2.09%)	36345036 (97.91%)
Si1	40073414	37128380 (92.65%)	853896 (2.30%)	36274484 (97.70%)
Si2	39691466	36632388 (92.29%)	816367 (2.23%)	35816021 (97.77%)
Si3	40110268	36760027 (91.65%)	826150 (2.25%)	35933877 (97.75%)

## Sheet: S6 Partial lipid metabolism rel
Table S6 Partial lipid metabolism related genes
Gene Symble	Description	UP/DOWN
KLF2	Kruppel like factor 2	DOWN
INHBA	inhibin beta A subunit	DOWN
BMP2	bone morphogenetic protein 2	DOWN
HMGCS2	3-hydroxy-3-methylglutaryl -CoA synthase 2	DOWN
APOA1	apolipoprotein A1	UP
STK32C	serine/threonine kinase 32C	UP
HMGCS1	3-hydroxy-3-methylglutaryl -CoA synthase 1	UP
INSIG1	insulin induced gene 1	UP
MSMO1	methylsterol monooxygenase 1	UP
PDGFRA	platelet-derived growth factor receptor, alpha polypeptide	UP
FDPS	farnesyl diphosphate synthase	UP

## Sheet: S7 SI VS. M share gene
Tablie 7 SI VS. M share gene
Gene Name	log2FoldChange
CHRNB2	-1.33571
MMP10	-1.84927
ENSGALG00000044002	-2.5898
TNFAIP6	-2.66584
ENSGALG00000026768	-3.68295
LRRC17	-3.30799
FDPS	-2.36084
CACNB3	-2.41711
FMO3	-2.12889
PDGFRA	-2.72726
GGT5	-2.61137
ENSGALG00000047814	-2.55688
ENSGALG00000009560	-2.5754
ENSGALG00000012317	-3.20508
CHRDL2	-3.70481
RSPO4	-3.64221
ENSGALG00000013033	-2.54977
STK32C	-3.69106
ENSGALG00000016483	-4.24746
DLX5	2.90764
TRABD2B	2.45789
C1QTNF12	4.48345
STAC	4.13734
SLN	4.90682
ENSGALG00000028612	6.11819
IGFBP5	2.42762
ENSGALG00000047383	4.84913
MYOT	3.34536
MEF2B	3.44609
MYBPC1	6.57502
MYH1B	4.55117
MYH1E	4.05306
BLK	Inf
NR4A3	1.54947
